# Supplementary material
Source: Springer Nature journal article supplement (https://www.springermedizin.de/resource/supplementary/13034_2014_264_MOESM2_ESM.pdf/9652668)

# NAIVE PATIENTS TREATED WITH ANTIPSYCHOTIC

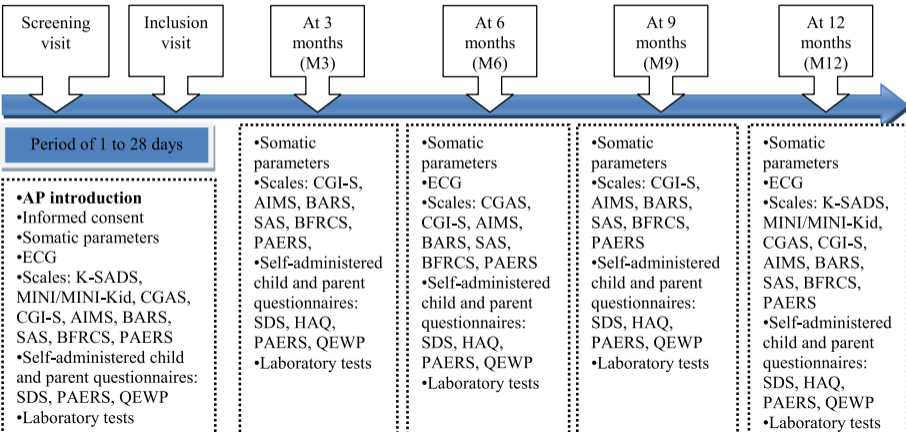

Supplement: MOESM2 [file 9652668]
